# Supplementary material for: Risk of AL Amyloidosis is Associated with Degree of Free Light Chain Elevation and Duration of Exposure
Source: Research Square preprint supplement (doi:10.21203/rs.3.rs-9227260/v1), 2026-04-08
Supplement: Supplementary file 1 [file 8e194a29fe94e9741c2ec681.pdf]

# 1 Supplementary Information

## 2 Supplemental Figures

### 3 Figure S1: Time from precursor diagnosis to development of AL amyloidosis according to 4 **precursor condition in cross-sectional and longitudinal cohorts**

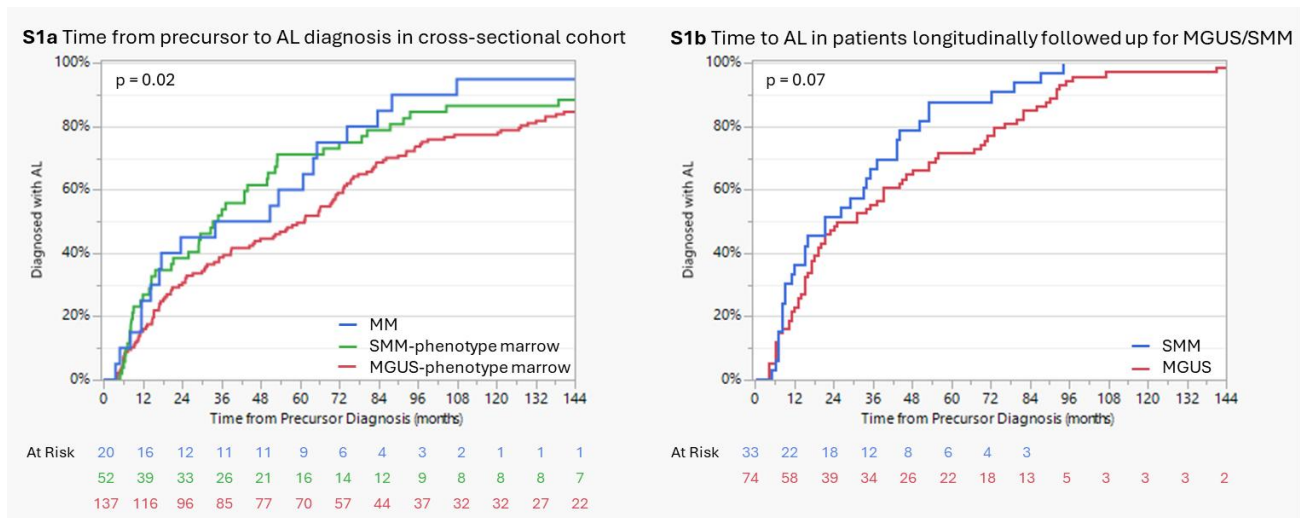

5

### 6 Figure S1: Time from precursor diagnosis to development of AL amyloidosis according 7 **to precursor condition and surveillance status.**

8 (A) Kaplan-Meier curves showing time from diagnosis of precursor plasma cell disorder to  
9 AL amyloidosis stratified by precursor type in cross-sectional analysis of AL patients. (B)  
10 Patients longitudinally followed for MGUS or SMM prior to AL diagnosis. Numbers at risk at  
11 each time point are displayed below the plots.

12 **Figure S2: Overall survival from AL amyloidosis diagnosis in cross-sectional cohort**

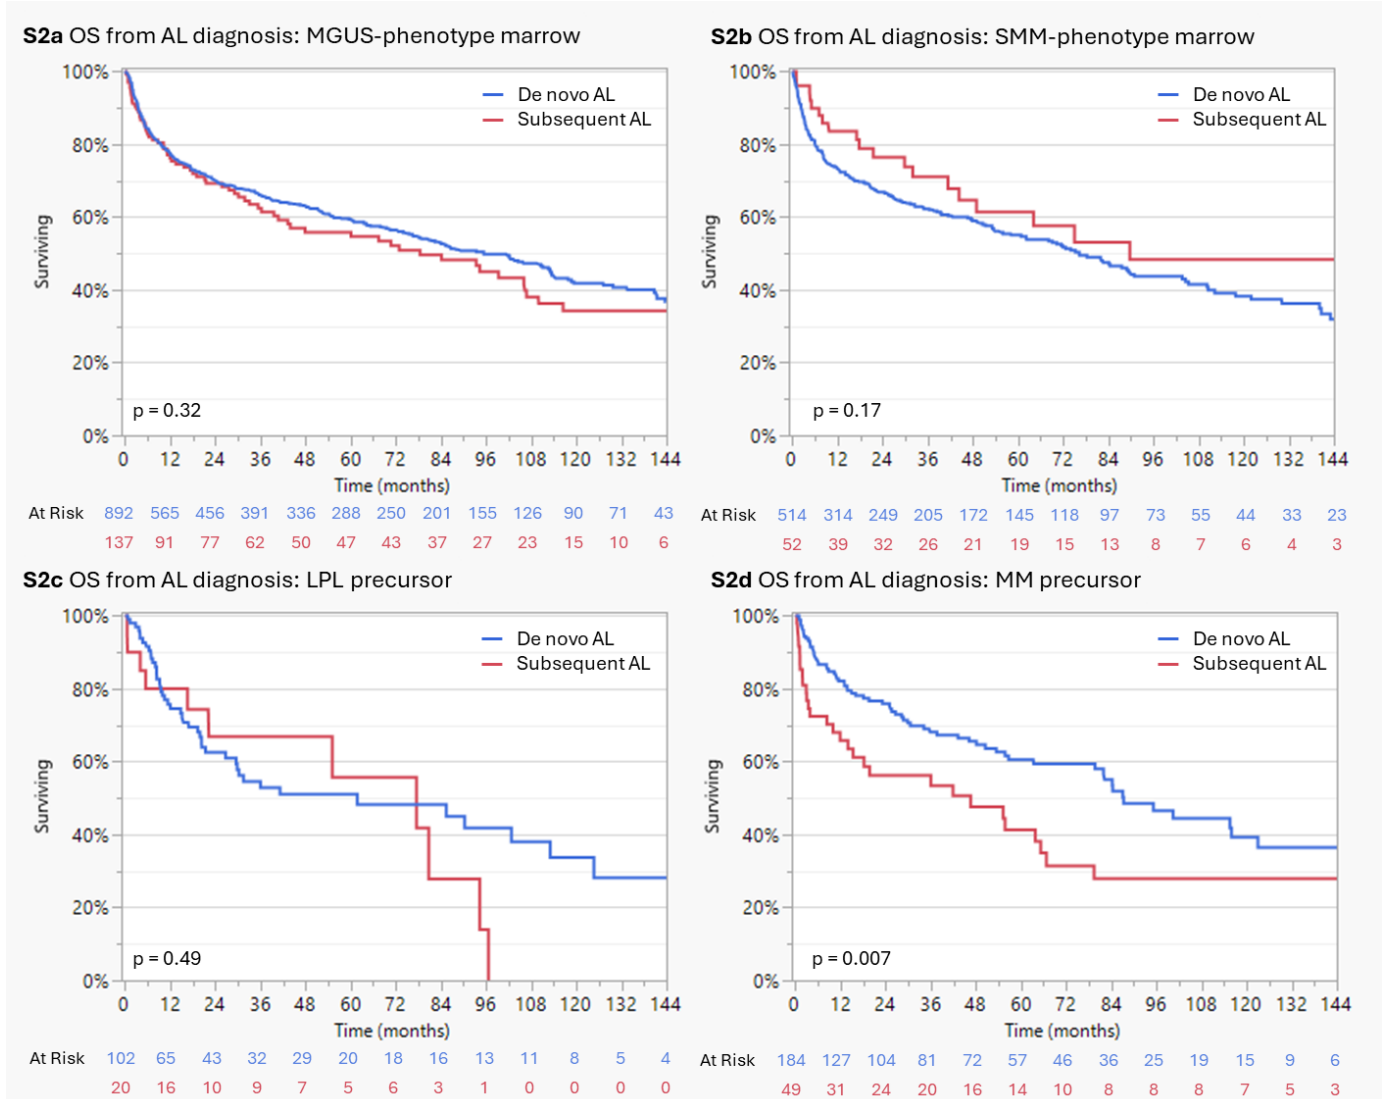

13

14 **Figure S2: Overall survival from AL amyloidosis diagnosis in cross-sectional cohort.**

15 Kaplan-Meier OS estimates from the time of AL amyloidosis diagnosis are shown stratified  
 16 by precursor disease and timing of AL occurrence. Panels depict patients with (A)  
 17 MGCS/MGUS, (B) smoldering multiple myeloma (SMM), (C) lymphoplasmacytic lymphoma  
 18 (LPL), and (D) multiple myeloma (MM) as precursor disorders.

19 **Figure S3: Overall survival of AL patients from precursor disease diagnosis in cross-sectional**  
 20 **cohort**

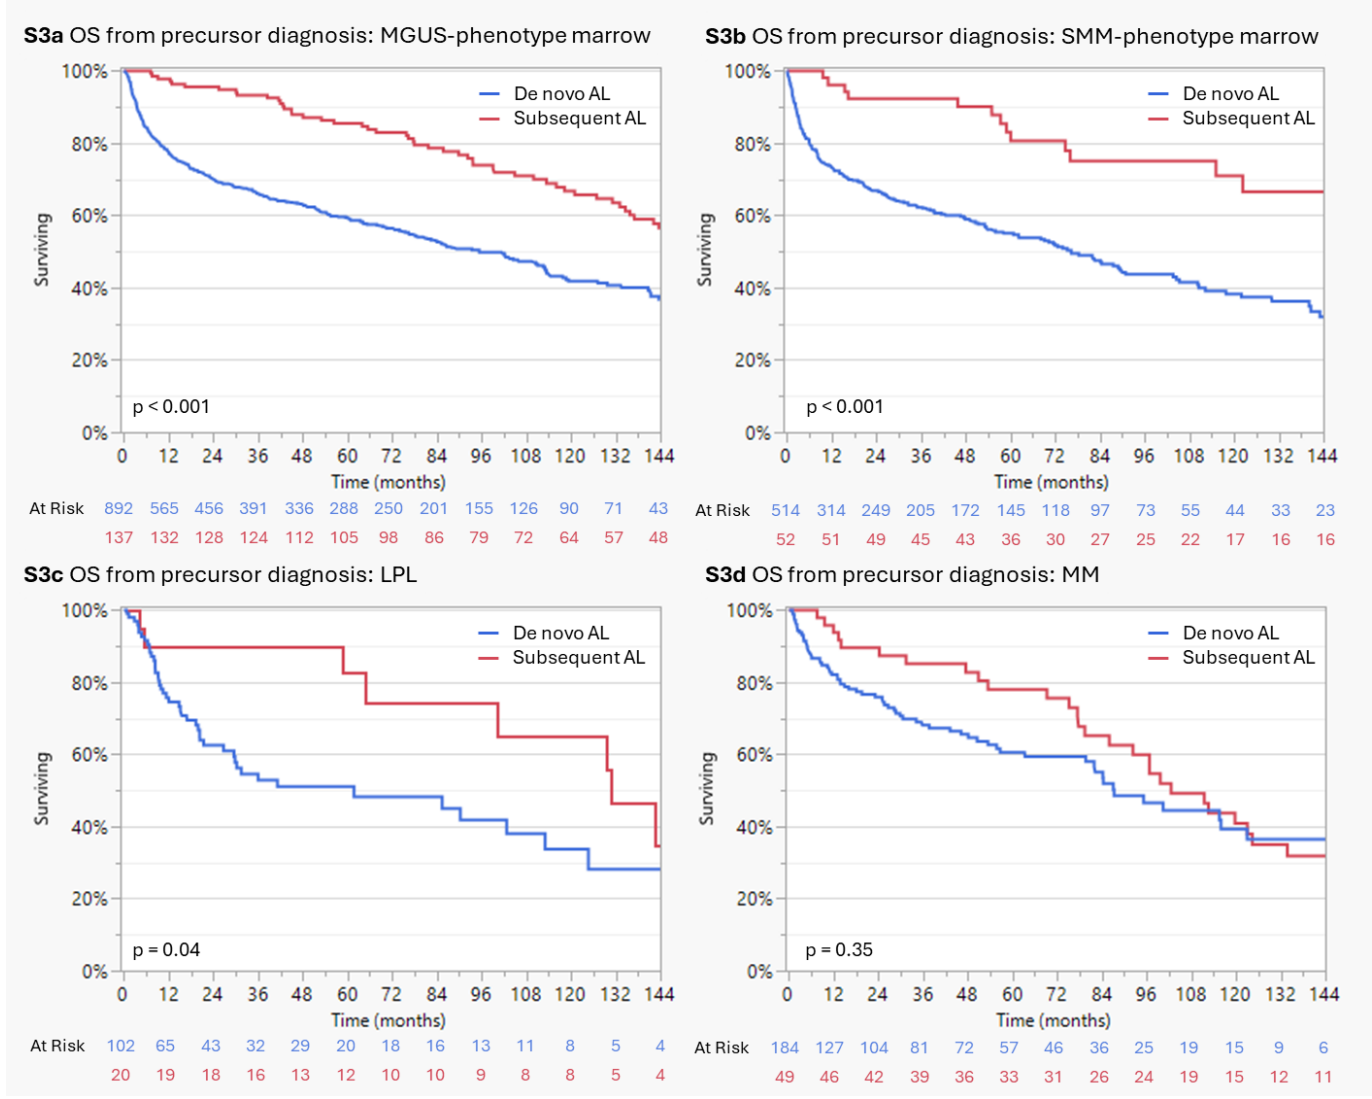

21  
 22 **Figure S3: Overall survival from precursor disease diagnosis in cross-sectional cohort.**

23 Kaplan-Meier OS estimates measured from the time of precursor disease diagnosis are  
 24 shown for patients with (A) MGCS/MGUS, (B) smoldering multiple myeloma (SMM), (C)  
 25 lymphoplasmacytic lymphoma (LPL), and (D) multiple myeloma (MM).

26 Supplemental Tables

27 Table S1: Factors associated with free light chain burden >6.4 mg/dL at AL diagnosis in the  
 28 **longitudinal cohort**

Risk factor for dFLC >6.4 mg/dL in  
 patients at AL diagnosis

|                               | n/N       | Univariable |            |                  | Multivariable <sup>a</sup> |           |                  |
|-------------------------------|-----------|-------------|------------|------------------|----------------------------|-----------|------------------|
|                               |           | OR          | 95%CI      | P-value          | OR                         | 95%CI     | P-value          |
| <b>Higher age</b>             | 1950      | 0.99        | 0.98-1.01  | 0.38             |                            |           |                  |
| <b>Female gender</b>          | 717/1950  | 0.84        | 0.65-1.08  | 0.18             |                            |           |                  |
| <b>Light chain type λ (%)</b> | 1209/1724 | 0.82        | 0.63-1.08  | 0.15             |                            |           |                  |
| <b>Proof of t(11;14)</b>      | 538/1005  | 1.18        | 0.83-1.69  | 0.36             |                            |           |                  |
| <b>M Protein &gt;1.5 g/dL</b> | 200/1362  | 1.56        | 1.01-2.40  | <b>0.04</b>      | 1.46                       | 0.89-2.41 | 0.14             |
| <b>Heavy chain type</b>       | 1425      |             |            |                  |                            |           |                  |
| No heavy chain secretion      | 525       | Ref         | Ref        | Ref              | Ref                        | Ref       | Ref              |
| IgG                           | 631       | 0.60        | 0.44-0.82  | <b>0.001</b>     | 0.38                       | 0.26-0.57 | <b>&lt;0.001</b> |
| IgA                           | 150       | 0.47        | 0.30-0.73  | <b>&lt;0.001</b> | 0.35                       | 0.21-0.60 | <b>&lt;0.001</b> |
| IgM                           | 108       | 0.44        | 0.57-0.71  | <b>0.001</b>     | 0.46                       | 0.25-0.85 | <b>0.01</b>      |
| IgD                           | 11        | 1.78        | 0.22-14.09 | 0.59             | 0.71                       | 0.08-6.21 | 0.76             |
| <b>BMPC &gt;5%</b>            | 541/1781  | 3.56        | 2.73-4.63  | <b>&lt;0.001</b> | 3.47                       | 2.51-4.79 | <b>&lt;0.001</b> |

29 <sup>a</sup> 1,232 events

30 Table S1: Factors associated with free light chain burden >6.4 mg/dL at AL diagnosis in  
 31 **the longitudinal cohort.**

32 Univariable and multivariable logistic regression analyses were performed to identify clinical  
 33 and clonal factors associated with dFLC >6.4 mg/dL at the time of AL diagnosis. Odds ratios

34 (ORs) are shown per unit increase for continuous variables. N/N represents the fulfilled  
35 variable out of all available datapoints, or only available datapoints given for variables with  
36 ranges. Statistically significant P values are shown in **bold**.
